# Supplementary material for: Relative validity and reliability of a diet risk score (DRS) for clinical practice
Source: HighWire-hosted journal article supplement (doi:10.1136/bmjnph-2020-000134), 2020-10-08
Supplement: bmjnph-2020-000134supp001_data_supplement.pdf [file bmjnph-2020-000134supp001_data_supplement.pdf]

## Supplementary Information

Supplementary Table 1 HEI-2015 Scoring Criteria

| Component <sup>1</sup>                          | Max. points | Standard for max score         | Standard for min (0)                |
|-------------------------------------------------|-------------|--------------------------------|-------------------------------------|
| <b>Adequacy:</b>                                |             |                                |                                     |
| <b>Total Fruits<sup>2</sup></b>                 | 5           | ≥0.8 cup equiv./1,000 kcal     | No Fruit                            |
| <b>Whole Fruits<sup>3</sup></b>                 | 5           | ≥0.4 cup equiv./1,000 kcal     | No Whole Fruit                      |
| <b>Total Vegetables<sup>4</sup></b>             | 5           | ≥1.1 cup equiv. per 1,000 kcal | No Vegetables                       |
| <b>Greens and Beans<sup>4</sup></b>             | 5           | ≥0.2 cup equiv./1,000 kcal     | No Dark Green Vegetables or Legumes |
| <b>Whole Grains</b>                             | 10          | ≥1.5 oz equiv./1,000 kcal      | No Whole Grains                     |
| <b>Dairy<sup>5</sup></b>                        | 10          | ≥1.3 cup equiv./ 1,000 kcal    | No Dairy                            |
| <b>Total Protein Foods<sup>6</sup></b>          | 5           | ≥2.5 oz equiv./1,000 kcal      | No Protein Foods                    |
| <b>Seafood and Plant Proteins<sup>6,7</sup></b> | 5           | ≥0.8 oz equiv./1,000 kcal      | No Seafood or Plant Proteins        |
| <b>Fatty Acids<sup>8</sup></b>                  | 10          | (PUFAs + MUFAs)/SFAs ≥2.5      | (PUFAs + MUFAs)/SFAs ≤1.2           |
| <b>Moderation:</b>                              |             |                                |                                     |
| <b>Refined Grains</b>                           | 10          | ≤1.8 oz equiv./1,000 kcal      | ≥4.3 oz equiv. per 1,000 kcal       |
| <b>Sodium</b>                                   | 10          | ≤1.1 gram/1,000 kcal           | ≥2.0 grams per 1,000 kcal           |
| <b>Added Sugars</b>                             | 10          | ≤6.5% of energy                | ≥26% of energy                      |
| <b>Saturated Fats</b>                           | 10          | ≤8% of energy                  | ≥16% of energy                      |

1: Intakes between the minimum and maximum standards are scored proportionately. 2: Includes 100% fruit juice. 3: Includes all forms except juice. 4: Includes legumes (beans and peas). 5: Includes all milk products, such as fluid milk, yogurt, and cheese, and fortified soy beverages. 6: Includes legumes (beans and peas). 7: Includes seafood, nuts, seeds, soy products (other than beverages), and legumes (beans and peas). 8: Ratio of poly- and monounsaturated fatty acids (PUFAs and MUFAs) to saturated fatty acids (SFAs). <https://epi.grants.cancer.gov/hei/developing.html>

Supplementary Table 2 Correlations of HEI 2005, 2010, 2015 with DRS

|     | HEI-2005 Score | HEI-2010 Score | HEI-2015 Score |
|-----|----------------|----------------|----------------|
| DRS | -0.47          | -0.66          | -0.60          |
|     | <.0001         | <.0001         | <.0001         |

Spearman Correlation Coefficients, N = 126

**Supplementary Table 3 HEI-2015 Mean Component Scores**

| <b>Component</b>                         | <b>HEI-2015 Component Means (95% CI)</b> |
|------------------------------------------|------------------------------------------|
| <b>Total Fruits<sup>2</sup></b>          | 3.1 (2.8, 3.4)                           |
| <b>Whole Fruits<sup>2</sup></b>          | 3.8 (3.5, 4.1)                           |
| <b>Total Vegetables<sup>2</sup></b>      | 4.7 (4.5, 4.8)                           |
| <b>Green and Beans<sup>2</sup></b>       | 4.2 (3.9, 4.4)                           |
| <b>Whole Grains<sup>1</sup></b>          | 4.0 (3.5, 4.6)                           |
| <b>Dairy<sup>1</sup></b>                 | 6.0 (5.5, 6.6)                           |
| <b>Total Protein<sup>2</sup></b>         | 4.4 (4.2, 4.6)                           |
| <b>Seafood/Plant Protein<sup>2</sup></b> | 3.8 (3.5, 4.1)                           |
| <b>Fatty Acids<sup>1</sup></b>           | 4.7 (4.1, 5.3)                           |
| <b>Refined Grains<sup>1</sup></b>        | 8.6 (8.2, 9.0)                           |
| <b>Sodium<sup>1</sup></b>                | 2.3 (1.8, 2.7)                           |
| <b>Added Sugars<sup>1</sup></b>          | 8.5 (8.1, 8.9)                           |
| <b>Saturated Fat<sup>1</sup></b>         | 5.1 (4.4, 5.7)                           |

*Data presented as means (95% CI); 1: Scored out of a maximum of 10 points, 2: Scored out of a maximum of 5 points.*
